# Supplementary material
Source: PubMed Central journal article supplement (PMC2764870)
Supplement: NIHMS129082-supplement-Prot_72_959_2008_supple.pdf [file NIHMS129082-supplement-Prot_72_959_2008_supple.pdf]

## ***Supplemental Material***

### **Tables S1, S2, S3, S4 Description**

RMSD values are listed for individual test cases within each loop length, 6, 8, 10, and 12 residues within tables S1, S2, S3, and S4, respectively. RMSD's are backbone heavy atom (N C C O). Energy gaps (Egap) are in kcal/mol and are the difference between the predicted and native energies (see Methods). An "S" in the energy gap columns means sampling failure where no loops under 1 Å were sampled to provide a native energy. Col 1: PDB ID, Cols 2 and 3: the first and last loop residue numbers, Cols 4, 5 and 6: RMSD of predicted loop, RMSD of best sampled loop, and energy gap using old protocol on unperturbed crystal structures, Cols 7, 8, 9: RMSD of predicted loop, RMSD of best sampled loop, and energy gap using our new protocol on unperturbed crystal structures. Col 10: Backbone RMSD of loops in starting perturbed crystal structure, Cols 11, 12, 13: RMSD of predicted loop, RMSD of best sampled loop, and energy gap using old protocol on perturbed crystal structures, Cols 14, 15, 16: RMSD of predicted loop, RMSD of best sampled loop, and energy gap using new protocol on perturbed crystal structures.

## S1

| 6res   | Loop start<br>res num | Loop end<br>res num | Native crystal  |                         |                    |                 |                         |                    | Perturbed crystal |                 |                         |                    |                 |                         |                    |
|--------|-----------------------|---------------------|-----------------|-------------------------|--------------------|-----------------|-------------------------|--------------------|-------------------|-----------------|-------------------------|--------------------|-----------------|-------------------------|--------------------|
|        |                       |                     | Old Protocol    |                         |                    | New Protocol    |                         |                    | Start<br>RMSD     | Old Protocol    |                         |                    | New Protocol    |                         |                    |
|        |                       |                     | Predict<br>RMSD | Best<br>sampled<br>RMSD | Egap<br>(kcal/mol) | Predict<br>RMSD | Best<br>sampled<br>RMSD | Egap<br>(kcal/mol) |                   | Predict<br>RMSD | Best<br>sampled<br>RMSD | Egap<br>(kcal/mol) | Predict<br>RMSD | Best<br>sampled<br>RMSD | Egap<br>(kcal/mol) |
| 1ads   | _:149                 | _:154               | 0.3             | 0.2                     | 0.0                | 0.2             | 0.2                     | 0.0                | 6.0               | 0.8             | 0.2                     | 0.0                | 0.2             | 0.2                     | 0.0                |
| 1arp   | _:282                 | _:287               | 0.2             | 0.2                     | 0.0                | 0.2             | 0.2                     | 0.0                | 4.8               | 0.8             | 0.6                     | 0.0                | 0.2             | 0.2                     | 0.0                |
| 1brt   | _:174                 | _:179               | 0.5             | 0.2                     | 0.0                | 0.4             | 0.2                     | 0.0                | 6.5               | 3.8             | 2.9                     | S                  | 0.5             | 0.2                     | 0.0                |
| 1cbs   | _:66                  | _:71                | 0.3             | 0.3                     | 0.0                | 0.4             | 0.3                     | 0.0                | 2.7               | 2.4             | 0.5                     | -0.9               | 0.6             | 0.5                     | 0.0                |
| 1gca   | _:100                 | _:105               | 0.2             | 0.2                     | 0.0                | 0.3             | 0.3                     | 0.0                | 2.6               | 0.3             | 0.2                     | 0.0                | 0.3             | 0.2                     | 0.0                |
| 1hbq   | _:15                  | _:20                | 0.4             | 0.2                     | 0.0                | 0.4             | 0.2                     | 0.0                | 3.6               | 0.5             | 0.4                     | 0.0                | 0.4             | 0.3                     | 0.0                |
| 1mrp   | _:215                 | _:220               | 0.8             | 0.3                     | 0.0                | 0.3             | 0.3                     | 0.0                | 1.9               | 1.7             | 0.8                     | -6.7               | 1.7             | 0.9                     | -6.9               |
| 1noa   | _:57                  | _:62                | 1.1             | 0.3                     | -0.6               | 1.1             | 0.3                     | -0.2               | 2.3               | 1.1             | 0.3                     | 0.0                | 1.1             | 0.3                     | 0.0                |
| 1onc   | _:12                  | _:17                | 0.3             | 0.2                     | 0.0                | 0.9             | 0.2                     | 0.0                | 5.0               | 3.4             | 0.7                     | -17.8              | 0.3             | 0.3                     | 0.0                |
| 1ppn   | _:144                 | _:149               | 0.3             | 0.2                     | 0.0                | 0.3             | 0.2                     | 0.0                | 3.0               | 0.5             | 0.5                     | 0.0                | 0.4             | 0.2                     | 0.0                |
| 1rie   | _:126                 | _:131               | 0.3             | 0.1                     | 0.0                | 0.4             | 0.2                     | 0.0                | 2.8               | 1.4             | 0.6                     | -5.5               | 0.4             | 0.2                     | 0.0                |
| 1tca   | _:94                  | _:99                | 0.3             | 0.3                     | 0.0                | 2.3             | 0.3                     | -6.1               | 3.2               | 0.3             | 0.3                     | 0.0                | 2.4             | 0.2                     | -6.5               |
| 1tys   | _:66                  | _:71                | 0.2             | 0.1                     | 0.0                | 0.1             | 0.1                     | 0.0                | 6.7               | 6.8             | 4.1                     | S                  | 0.2             | 0.2                     | 0.0                |
| 1xif   | _:357                 | _:362               | 3.3             | 1.3                     | S                  | 3.5             | 0.6                     | -9.2               | 4.0               | 1.2             | 1.3                     | S                  | 0.3             | 0.2                     | 0.0                |
| 2cba   | _:82                  | _:87                | 0.5             | 0.5                     | 0.0                | 0.8             | 0.5                     | 0.0                | 2.3               | 1.1             | 1.1                     | 0.0                | 0.8             | 0.5                     | 0.0                |
| 2cpl   | _:122                 | _:127               | 0.3             | 0.2                     | 0.0                | 0.3             | 0.2                     | 0.0                | 0.8               | 0.9             | 0.3                     | 0.0                | 0.8             | 0.2                     | 0.0                |
| 2pth   | _:136                 | _:141               | 0.3             | 0.1                     | 0.0                | 0.4             | 0.2                     | 0.0                | 2.8               | 1.9             | 1.8                     | S                  | 0.2             | 0.2                     | 0.0                |
| 3tgl   | _:82                  | _:87                | 3.1             | 0.3                     | -7.5               | 3.1             | 0.4                     | -6.9               | 3.0               | 2.9             | 0.5                     | -7.1               | 3.1             | 0.3                     | -3.1               |
| 5p21   | _:104                 | _:109               | 0.5             | 0.4                     | 0.0                | 0.5             | 0.4                     | 0.0                | 2.3               | 1.2             | 1.2                     | S                  | 0.5             | 0.4                     | 0.0                |
| 7rsa   | _:14                  | _:19                | 1.0             | 0.2                     | 0.0                | 1.0             | 0.2                     | 0.0                | 2.4               | 0.9             | 0.3                     | 0.0                | 1.2             | 0.2                     | -0.8               |
| Median |                       |                     | 0.3             | 0.2                     |                    | 0.4             | 0.2                     |                    | 2.9               | 1.1             | 0.5                     |                    | 0.4             | 0.2                     |                    |
| Avg    |                       |                     | 0.7             | 0.3                     |                    | 0.8             | 0.3                     |                    | 3.4               | 1.7             | 0.9                     |                    | 0.8             | 0.3                     |                    |

S2

| 8res   | Loop start<br>res num | Loop end<br>res num | Native crystal  |                         |                    |                 |                         |                    | Perturbed crystal |                 |                         |                    |                 |                         |                    |
|--------|-----------------------|---------------------|-----------------|-------------------------|--------------------|-----------------|-------------------------|--------------------|-------------------|-----------------|-------------------------|--------------------|-----------------|-------------------------|--------------------|
|        |                       |                     | Old Protocol    |                         |                    | New Protocol    |                         |                    | Start<br>RMSD     | Old Protocol    |                         |                    | New Protocol    |                         |                    |
|        |                       |                     | Predict<br>RMSD | Best<br>sampled<br>RMSD | Egap<br>(kcal/mol) | Predict<br>RMSD | Best<br>sampled<br>RMSD | Egap<br>(kcal/mol) |                   | Predict<br>RMSD | Best<br>sampled<br>RMSD | Egap<br>(kcal/mol) | Predict<br>RMSD | Best<br>sampled<br>RMSD | Egap<br>(kcal/mol) |
| 135l   | _:84                  | _:91                | 0.4             | 0.2                     | 0.0                | 2.6             | 0.4                     | -17.4              | 5.2               | 2.1             | 0.9                     | -5.3               | 2.5             | 0.3                     | -13.3              |
| 1alc   | _:34                  | _:41                | 5.9             | 2.5                     | S                  | 4.5             | 1.0                     | -37.9              | 5.6               | 5.2             | 2.7                     | S                  | 6.9             | 0.4                     | -6.4               |
| 1btl   | _:50                  | _:57                | 0.3             | 0.3                     | 0.0                | 1.6             | 0.2                     | -1.3               | 7.2               | 3.1             | 2.0                     | S                  | 0.9             | 0.5                     | 0.0                |
| 1cex   | _:73                  | _:80                | 3.9             | 0.6                     | -6.8               | 3.7             | 0.6                     | -3.2               | 4.8               | 3.2             | 1.6                     | S                  | 2.5             | 1.5                     | S                  |
| 1clc   | _:313                 | _:320               | 0.3             | 0.2                     | 0.0                | 3.0             | 0.2                     | -1.4               | 4.8               | 4.3             | 2.7                     | S                  | 0.4             | 0.2                     | 0.0                |
| 1ddt   | _:127                 | _:134               | 1.0             | 0.3                     | 0.0                | 0.9             | 0.3                     | 0.0                | 3.4               | 0.9             | 0.4                     | 0.0                | 1.1             | 0.4                     | 0.0                |
| 1ezm   | _:92                  | _:99                | 0.4             | 0.2                     | 0.0                | 0.5             | 0.3                     | 0.0                | 2.7               | 3.2             | 1.8                     | S                  | 0.5             | 0.3                     | 0.0                |
| 1hfc   | _:142                 | _:149               | 0.2             | 0.2                     | 0.0                | 0.3             | 0.2                     | 0.0                | 7.3               | 0.4             | 0.5                     | 0.0                | 0.3             | 0.2                     | 0.0                |
| 1iab   | _:48                  | _:55                | 1.6             | 0.5                     | -0.3               | 0.8             | 0.4                     | 0.0                | 2.4               | 2.6             | 0.7                     | -14.1              | 0.5             | 0.3                     | 0.0                |
| 1ivd   | _:413                 | _:420               | 0.9             | 0.7                     | 0.0                | 1.1             | 0.6                     | -1.9               | 3.3               | 3.3             | 2.3                     | S                  | 1.3             | 0.7                     | -2.9               |
| 1lst   | _:101                 | _:108               | 0.6             | 0.2                     | 0.0                | 0.7             | 0.3                     | 0.0                | 7.0               | 0.9             | 0.5                     | 0.0                | 0.7             | 0.3                     | 0.0                |
| 1nar   | _:192                 | _:199               | 0.6             | 0.4                     | 0.0                | 1.5             | 0.4                     | -10.3              | 2.7               | 0.7             | 0.6                     | 0.0                | 1.2             | 0.6                     | -4.0               |
| 1ovc   | _:80                  | _:87                | 0.5             | 0.3                     | 0.0                | 0.4             | 0.2                     | 0.0                | 2.1               | 2.2             | 0.7                     | -4.1               | 0.6             | 0.3                     | 0.0                |
| 1prn   | _:150                 | _:157               | 1.7             | 1.1                     | S                  | 2.4             | 0.3                     | -10.8              | 4.1               | 0.7             | 0.3                     | 0.0                | 2.3             | 0.4                     | -9.6               |
| 1sbp   | _:107                 | _:114               | 3.3             | 3.9                     | S                  | 0.3             | 0.2                     | 0.0                | 3.8               | 3.4             | 1.9                     | S                  | 0.3             | 0.2                     | 0.0                |
| 1tml   | _:187                 | _:194               | 0.3             | 0.2                     | 0.0                | 1.4             | 0.2                     | -14.5              | 2.1               | 1.2             | 1.0                     | -2.0               | 1.5             | 0.4                     | -19.3              |
| 2cmd   | _:270                 | _:277               | 0.4             | 0.2                     | 0.0                | 0.4             | 0.2                     | 0.0                | 8.0               | 6.4             | 1.2                     | S                  | 0.4             | 0.3                     | 0.0                |
| 2exo   | _:262                 | _:269               | 0.4             | 0.2                     | 0.0                | 0.4             | 0.2                     | 0.0                | 3.5               | 1.9             | 1.3                     | S                  | 0.7             | 0.2                     | 0.0                |
| 2sga   | _:32                  | _:43                | 1.2             | 1.0                     | 0.0                | 1.2             | 0.6                     | 0.0                | 4.0               | 1.0             | 0.9                     | 0.0                | 1.1             | 0.4                     | 0.0                |
| 5p2l   | _:45                  | _:52                | 0.4             | 0.3                     | 0.0                | 0.9             | 0.3                     | 0.0                | 2.4               | 2.2             | 0.7                     | -3.5               | 0.8             | 0.3                     | 0.0                |
| Median |                       |                     | 0.6             | 0.3                     |                    | 1.0             | 0.3                     |                    | 3.9               | 2.2             | 1.0                     |                    | 0.8             | 0.3                     |                    |
| Avg    |                       |                     | 1.2             | 0.7                     |                    | 1.4             | 0.4                     |                    | 4.3               | 2.4             | 1.2                     |                    | 1.3             | 0.4                     |                    |

S3

| 10res  | Loop start res num | Loop end res num | Native crystal |                   |                 |              |                   |                 | Perturbed crystal |              |                   |                 |              |                   |                 |
|--------|--------------------|------------------|----------------|-------------------|-----------------|--------------|-------------------|-----------------|-------------------|--------------|-------------------|-----------------|--------------|-------------------|-----------------|
|        |                    |                  | Old Protocol   |                   |                 | New Protocol |                   |                 | Start RMSD        | Old Protocol |                   |                 | New Protocol |                   |                 |
|        |                    |                  | Predict RMSD   | Best sampled RMSD | Egap (kcal/mol) | Predict RMSD | Best sampled RMSD | Egap (kcal/mol) |                   | Predict RMSD | Best Sampled RMSD | Egap (kcal/mol) | Predict RMSD | Best sampled RMSD | Egap (kcal/mol) |
| 1ads   | :170               | :179             | 0.8            | 0.4               | 0.0             | 2.3          | 0.8               | -18.8           | 8.8               | 0.7          | 0.4               | 0.0             | 0.8          | 0.6               | 0.0             |
| 1arb   | :41                | :50              | 0.5            | 0.4               | 0.0             | 1.2          | 0.8               | 0.0             | 5.8               | 4.1          | 1.2               | S               | 1.1          | 0.4               | -3.1            |
| 1aru   | :128               | :137             | 0.2            | 0.2               | 0.0             | 0.3          | 0.2               | 0.0             | 1.8               | 1.8          | 0.7               | 0.0             | 2.0          | 0.2               | -1.3            |
| 1dim   | :87                | :96              | 0.2            | 0.2               | 0.0             | 1.1          | 0.3               | 0.0             | 4.0               | 1.1          | 0.6               | 0.0             | 1.0          | 0.4               | 0.0             |
| 1edg   | :269               | :278             | 0.2            | 0.2               | 0.0             | 0.2          | 0.2               | 0.0             | 9.2               | 3.1          | 1.6               | S               | 3.0          | 0.9               | -42.9           |
| 1gvp   | :49                | :58              | 3.3            | 0.7               | -11.7           | 2.7          | 0.8               | -10.0           | 5.6               | 2.5          | 1.2               | S               | 3.1          | 1.0               | -19.0           |
| 1ixh   | :84                | :93              | 1.0            | 0.7               | 0.0             | 1.0          | 0.6               | 0.0             | 4.3               | 0.8          | 0.6               | 0.0             | 1.2          | 0.4               | -0.1            |
| 1lst   | :10                | :19              | 0.6            | 0.2               | 0.0             | 0.7          | 0.3               | 0.0             | 4.7               | 2.0          | 1.3               | S               | 0.5          | 0.5               | 0.0             |
| 1mrj   | :173               | :182             | 0.6            | 0.3               | 0.0             | 0.7          | 0.2               | 0.0             | 5.1               | 0.9          | 0.7               | 0.0             | 0.3          | 0.2               | 0.0             |
| 1pgs   | :68                | :77              | 0.4            | 0.3               | 0.0             | 1.8          | 0.7               | -12.2           | 3.6               | 2.9          | 0.5               | -1.5            | 3.1          | 1.0               | -69.6           |
| 1plc   | :42                | :51              | 1.2            | 0.5               | -3.9            | 1.1          | 0.9               | -0.7            | 4.4               | 1.2          | 0.6               | -1.0            | 1.2          | 0.5               | 0.0             |
| 1scs   | :65                | :74              | 0.4            | 0.3               | 0.0             | 2.2          | 0.5               | -8.3            | 3.1               | 2.8          | 0.3               | -7.3            | 2.1          | 0.6               | -30.5           |
| 1tca   | :23                | :32              | 1.0            | 0.2               | 0.0             | 0.7          | 0.3               | 0.0             | 10.6              | 0.8          | 0.3               | 0.0             | 1.8          | 0.2               | -0.9            |
| 2alp   | :90                | :105             | 0.2            | 0.2               | 0.0             | 0.4          | 0.2               | 0.0             | 3.7               | 0.4          | 0.3               | 0.0             | 0.3          | 0.2               | 0.0             |
| 2ayh   | :80                | :89              | 0.2            | 0.2               | 0.0             | 0.2          | 0.2               | 0.0             | 2.5               | 0.3          | 0.3               | 0.0             | 0.2          | 0.2               | 0.0             |
| 2cmd   | :57                | :66              | 0.4            | 0.3               | 0.0             | 0.7          | 0.4               | 0.0             | 3.7               | 2.0          | 1.0               | S               | 1.0          | 0.4               | 0.0             |
| 2mnr   | :91                | :100             | 0.6            | 0.4               | 0.0             | 0.8          | 0.6               | 0.0             | 3.8               | 1.3          | 0.5               | -9.9            | 4.6          | 0.7               | -4.9            |
| 2sil   | :197               | :206             | 0.4            | 0.3               | 0.0             | 0.3          | 0.3               | 0.0             | 3.6               | 2.2          | 0.9               | -24.9           | 0.4          | 0.3               | 0.0             |
| 3tgl   | :257               | :266             | 0.3            | 0.3               | 0.0             | 0.8          | 0.4               | 0.0             | 6.3               | 1.7          | 1.4               | S               | 0.8          | 0.5               | 0.0             |
| 7rsa   | :33                | :42              | 0.4            | 0.4               | 0.0             | 1.0          | 0.5               | 0.0             | 3.6               | 1.2          | 0.4               | 0.0             | 1.0          | 0.5               | 0.0             |
| Median |                    |                  | 0.4            | 0.3               |                 | 0.8          | 0.4               |                 | 4.2               | 1.5          | 0.6               |                 | 1.1          | 0.4               |                 |
| Avg    |                    |                  | 0.6            | 0.3               |                 | 1.0          | 0.5               |                 | 4.9               | 1.7          | 0.7               |                 | 1.5          | 0.5               |                 |

S4

| 12res  | Loop start<br>res num | Loop end<br>res num | Native crystal  |                         |                    |                 |                         |                    |     | Perturbed crystal |                 |                         |                    |                 |                         |                    |   |
|--------|-----------------------|---------------------|-----------------|-------------------------|--------------------|-----------------|-------------------------|--------------------|-----|-------------------|-----------------|-------------------------|--------------------|-----------------|-------------------------|--------------------|---|
|        |                       |                     | Old Protocol    |                         |                    | New Protocol    |                         |                    |     | Start<br>RMSD     | Old Protocol    |                         |                    | New Protocol    |                         |                    |   |
|        |                       |                     | Predict<br>RMSD | Best<br>sampled<br>RMSD | Egap<br>(kcal/mol) | Predict<br>RMSD | Best<br>sampled<br>RMSD | Egap<br>(kcal/mol) | S   |                   | Predict<br>RMSD | Best<br>sampled<br>RMSD | Egap<br>(kcal/mol) | Predict<br>RMSD | Best<br>sampled<br>RMSD | Egap<br>(kcal/mol) | S |
| 1a8d   | _:155                 | _:166               | 1.0             | 1.1                     | 0.0                | 2.7             | 1.4                     | S                  | 4.0 | 0.9               | 0.8             | 0.0                     | 2.8                | 1.4             | S                       |                    |   |
| 1arb   | _:182                 | _:193               | 2.5             | 0.6                     | -2.4               | 1.0             | 0.5                     | 0.0                | 4.8 | 2.2               | 0.6             | -8.4                    | 2.6                | 0.5             | -3.3                    |                    |   |
| 1bhe   | _:121                 | _:132               | 0.5             | 0.4                     | 0.0                | 0.5             | 0.5                     | 0.0                | 4.5 | 1.0               | 0.8             | 0.0                     | 0.7                | 0.7             | 0.0                     |                    |   |
| 1bn8   | A:298                 | A:309               | 1.5             | 0.4                     | -3.2               | 1.3             | 0.6                     | -24.7              | 5.0 | 8.3               | 2.4             | S                       | 2.6                | 0.5             | -3.9                    |                    |   |
| 1c5e   | A:82                  | A:93                | 0.4             | 0.3                     | 0.0                | 0.4             | 0.3                     | 0.0                | 5.1 | 1.8               | 0.8             | -45.8                   | 1.7                | 1.0             | -51.3                   |                    |   |
| 1cb0   | A:33                  | A:44                | 0.3             | 0.2                     | 0.0                | 0.3             | 0.3                     | 0.0                | 5.0 | 0.4               | 0.4             | 0.0                     | 0.3                | 0.3             | 0.0                     |                    |   |
| 1cnv   | _:188                 | _:199               | 2.2             | 0.6                     | -14.1              | 1.5             | 0.7                     | -9.9               | 4.5 | 3.2               | 0.9             | -48.5                   | 3.3                | 1.0             | -45.0                   |                    |   |
| 1cs6   | A:145                 | A:156               | 0.6             | 0.4                     | 0.0                | 1.6             | 0.4                     | -7.7               | 5.1 | 3.4               | 1.4             | S                       | 3.5                | 1.4             | S                       |                    |   |
| 1dqz   | A:209                 | A:220               | 0.3             | 0.3                     | 0.0                | 0.7             | 0.3                     | 0.0                | 4.8 | 1.2               | 0.4             | -3.8                    | 0.6                | 0.3             | 0.0                     |                    |   |
| 1exm   | A:291                 | A:302               | 0.7             | 0.4                     | 0.0                | 4.5             | 1.2                     | S                  | 4.6 | 4.0               | 1.2             | S                       | 0.5                | 0.5             | 0.0                     |                    |   |
| 1f46   | A:64                  | A:75                | 0.3             | 0.2                     | 0.0                | 0.5             | 0.4                     | 0.0                | 5.1 | 3.8               | 0.3             | -15.4                   | 1.1                | 1.2             | 0.0                     |                    |   |
| 1i7p   | A:63                  | _:74                | 0.3             | 0.2                     | 0.0                | 0.3             | 0.2                     | 0.0                | 5.0 | 0.5               | 0.5             | 0.0                     | 0.3                | 0.2             | 0.0                     |                    |   |
| 1m3s   | A:68                  | A:79                | 5.0             | 0.7                     | -34.5              | 5.1             | 1.4                     | S                  | 5.0 | 5.3               | 1.3             | S                       | 5.6                | 0.6             | -49.5                   |                    |   |
| 1ms9   | A:529                 | A:540               | 1.9             | 0.6                     | -16.8              | 2.8             | 0.5                     | -31.7              | 2.9 | 2.9               | 0.5             | -23.7                   | 2.5                | 0.5             | -31.5                   |                    |   |
| 1my7   | A:254                 | A:265               | 0.5             | 0.4                     | 0.0                | 0.9             | 0.6                     | 0.0                | 5.1 | 1.4               | 0.8             | -8.2                    | 0.9                | 0.6             | 0.0                     |                    |   |
| 1oth   | A:69                  | A:80                | 1.8             | 0.4                     | -0.8               | 0.5             | 0.5                     | 0.0                | 4.1 | 2.3               | 2.1             | S                       | 0.7                | 0.7             | 0.0                     |                    |   |
| 1oyc   | _:203                 | _:214               | 0.5             | 0.4                     | 0.0                | 0.5             | 0.3                     | 0.0                | 5.2 | 2.8               | 1.2             | S                       | 1.2                | 0.4             | -7.5                    |                    |   |
| 1qlw   | A:31                  | A:42                | 1.9             | 0.3                     | -22.3              | 2.0             | 1.6                     | S                  | 4.1 | 1.5               | 0.8             | -10.1                   | 1.4                | 1.1             | S                       |                    |   |
| 1t1d   | A:127                 | A:138               | 0.5             | 0.4                     | 0.0                | 0.8             | 0.5                     | 0.0                | 3.3 | 0.6               | 0.5             | 0.0                     | 1.0                | 0.6             | 0.0                     |                    |   |
| 2pia   | _:30                  | _:41                | 0.6             | 0.4                     | 0.0                | 0.5             | 0.4                     | 0.0                | 4.6 | 3.7               | 1.0             | -7.6                    | 0.5                | 0.4             | 0.0                     |                    |   |
| Median |                       |                     | 0.6             | 0.4                     |                    | 0.9             | 0.5                     |                    | 4.8 | 2.3               | 0.8             |                         | 1.2                | 0.6             |                         |                    |   |
| Avg    |                       |                     | 1.2             | 0.4                     |                    | 1.4             | 0.6                     |                    | 4.6 | 2.6               | 0.9             |                         | 1.7                | 0.7             |                         |                    |   |

## **Table S5 description**

Comparison of loop predictions using previously published protocol (without simultaneous optimization of surrounding side chains) with and without inclusion of crystal symmetry chains on unperturbed crystal structures. Atoms from chains within the crystal are included if they are within 20 Å of any primary-chain atom. RMSD values are calculated for backbone heavy atoms for each prediction. Differences between these two predictions enable us to identify crystal packing effects on our predictions.

Table S5

| With<br>Crystal<br>Symmetry? |     |     |                   |     |                    |        |     |                    |        |     |     |
|------------------------------|-----|-----|-------------------|-----|--------------------|--------|-----|--------------------|--------|-----|-----|
|                              | Y   | N   | Y                 | N   | Y                  | N      | Y   | N                  | Y      | N   |     |
| 6<br>residues                |     |     | 8<br>residue<br>s |     | 10<br>residue<br>s |        |     | 12<br>residue<br>s |        |     |     |
| 1ads                         | 0.3 | 0.3 | 135l              | 3.6 | 0.4                | 1ads   | 0.8 | 0.8                | 1a8d   | 1.1 | 1.0 |
| 1arp                         | 0.2 | 0.2 | 1alc              | 5.6 | 5.9                | 1arb   | 1.2 | 0.5                | 1arb   | 1.2 | 2.5 |
| 1brt                         | 0.5 | 0.5 | 1btl              | 0.4 | 0.3                | 1aru   | 0.3 | 0.2                | 1bhe   | 0.9 | 0.5 |
| 1cbs                         | 0.3 | 0.3 | 1cex              | 3.8 | 3.9                | 1dim   | 0.9 | 0.2                | 1bn8   | 1.5 | 1.5 |
| 1gca                         | 0.3 | 0.2 | 1clc              | 0.3 | 0.3                | 1edg   | 0.2 | 0.2                | 1c5e   | 0.4 | 0.4 |
| 1hbq                         | 0.3 | 0.4 | 1ddt              | 1.0 | 1.0                | 1gvp   | 1.9 | 3.3                | 1cb0   | 0.2 | 0.3 |
| 1mrp                         | 0.3 | 0.8 | 1ezm              | 0.4 | 0.4                | 1lix   | 1.0 | 1.0                | 1cnv   | 0.7 | 2.2 |
| 1noa                         | 2.0 | 1.1 | 1hfc              | 0.2 | 0.2                | 1l1st  | 0.6 | 0.6                | 1cs6   | 0.9 | 0.6 |
| 1onc                         | 0.7 | 0.3 | 1iab              | 0.4 | 1.6                | 1mrj   | 0.2 | 0.6                | 1dqz   | 0.3 | 0.3 |
| 1ppn                         | 0.2 | 0.3 | 1ivd              | 1.0 | 0.9                | 1pgs   | 0.6 | 0.4                | 1exm   | 1.0 | 0.7 |
| 1rie                         | 0.3 | 0.3 | 1l1st             | 0.6 | 0.6                | 1plc   | 0.6 | 1.2                | 1f46   | 0.5 | 0.3 |
| 1tca                         | 0.4 | 0.3 | 1nar              | 0.5 | 0.6                | 1scs   | 0.3 | 0.4                | 1i7p   | 0.3 | 0.3 |
| 1tys                         | 0.1 | 0.2 | 1oyc              | 0.5 | 0.5                | 1tca   | 0.5 | 1.0                | 1m3s   | 0.5 | 5.0 |
| 1xif                         | 0.2 | 3.3 | 1prn              | 0.3 | 1.7                | 2alp   | 0.2 | 0.2                | 1ms9   | 1.9 | 1.9 |
| 2cba                         | 1.0 | 0.5 | 1sbp              | 0.4 | 3.3                | 2ayh   | 0.2 | 0.2                | 1my7   | 0.5 | 0.5 |
| 2cpl                         | 0.3 | 0.3 | 1tml              | 0.3 | 0.3                | 2cmd   | 0.4 | 0.4                | 1oth   | 0.5 | 1.8 |
| 2pth                         | 0.5 | 0.3 | 2cmd              | 0.2 | 0.4                | 2mnr   | 0.4 | 0.6                | 1oyc   | 0.4 | 0.5 |
| 3tgl                         | 0.7 | 3.1 | 2exo              | 0.2 | 0.4                | 2sil   | 0.5 | 0.4                | 1qlw   | 1.7 | 1.9 |
| 5p21                         | 0.4 | 0.5 | 2sga              | 1.0 | 1.2                | 3tgl   | 0.5 | 0.3                | 1t1d   | 1.1 | 0.5 |
| 7rsa                         | 0.8 | 1.0 | 5p21              | 0.2 | 0.4                | 7rsa   | 0.2 | 0.4                | 2pia   | 0.4 | 0.6 |
| Median                       | 0.3 | 0.3 | Median            | 0.4 | 0.6                | Median | 0.5 | 0.4                | Median | 0.6 | 0.6 |
| Avg                          | 0.5 | 0.7 | Avg               | 1.1 | 1.2                | Avg    | 0.6 | 0.6                | Avg    | 0.8 | 1.2 |

### Table S6 Description

Overall median and average predicted backbone RMSD's are listed for the unperturbed (top) and perturbed (bottom) *filtered* test sets for both the old HLP and new HLP-SS methods. The filtered statistics are across all test cases but with the 9 cases removed that were determined to be adversely affected by crystal packing (see Results).

**Table S6**

|             |  | Crystal structures |          |             |          |
|-------------|--|--------------------|----------|-------------|----------|
|             |  | Previous Method    |          | New Method  |          |
| Loop Length |  | Median RMSD        | Avg RMSD | Median RMSD | Avg RMSD |
| 6 Residues  |  | 0.3                | 0.4      | 0.4         | 0.6      |
| 8 Residues  |  | 0.4                | 1.0      | 1.1         | 1.5      |
| 10 Residues |  | 0.4                | 0.6      | 0.8         | 1.0      |
| 12 Residues |  | 0.5                | 0.7      | 0.7         | 1.3      |

|             |  | Perturbed crystal structures |          |             |          |
|-------------|--|------------------------------|----------|-------------|----------|
|             |  | Previous Method              |          | New Method  |          |
| Loop Length |  | Median RMSD                  | Avg RMSD | Median RMSD | Avg RMSD |
| 6 Residues  |  | 1.1                          | 1.7      | 0.4         | 0.7      |
| 8 Residues  |  | 2.2                          | 2.5      | 0.9         | 1.4      |
| 10 Residues |  | 1.5                          | 1.7      | 1.1         | 1.5      |
| 12 Residues |  | 1.6                          | 2.4      | 1.1         | 1.3      |
